# Supplementary material
Source: Elsevier journal article supplement (https://www.sciencedirect.com/science/article/pii/S2605073021000122)

**ANEXO 1**

Encuesta

| Edad | 18-29 | 30-39 | 40-49 | 50-59 | 60-79 | 80-89 | >90 |
| --- | --- | --- | --- | --- | --- | --- | --- |
|  |  |  |  |  |  |  |

| Sexo | Hombre | Mujer |
| --- | --- | --- |
|  |  |

| Nivel de Estudios | Sin estudios | Primarios | Secundarios | Superior |
| --- | --- | --- | --- | --- |
|  |  |  |  |

| **FRECUENCIA DE CONSUMO DE SAL** |  |  |  |  |  |
| --- | --- | --- | --- | --- | --- |
|  |  |  |  |  |  |
| **ALTO CONTENIDO EN SAL** | Nunca | Raramente | Alguna vez | A menudo | Siempre |
| Congelados |  |  |  |  |  |
| Enlatados (conservas, mermeladas,) |  |  |  |  |  |
| Aperitivos (patatas chips, snacks,..) |  |  |  |  |  |
| Carne procesada (salchicha, hamburguesa,..) |  |  |  |  |  |
| Queso |  |  |  |  |  |
| Embutido |  |  |  |  |  |
| Panificados (pan, cereales) |  |  |  |  |  |
| Refrescos (agua con gas) |  |  |  |  |  |
| Salsas |  |  |  |  |  |
| Sopas instantáneas dehidratadas |  |  |  |  |  |
| "Cubitos" de caldo |  |  |  |  |  |

| **BAJO CONTENIDO EN SAL** | Nunca | Raramente | Alguna vez | A menudo | Siempre |
| --- | --- | --- | --- | --- | --- |
| Carne fresca |  |  |  |  |  |
| Pollo |  |  |  |  |  |
| Conejo |  |  |  |  |  |
| Huevos |  |  |  |  |  |
| Pescado |  |  |  |  |  |
| Fruta |  |  |  |  |  |
| Verdura |  |  |  |  |  |
| Legumbres |  |  |  |  |  |
| Leche |  |  |  |  |  |

Nunca: menos de 1 vez al mes; Rara vez: 1 vez al mes; Alguna vez: 1 vez por semana; A menudo: 2-3 veces por semana; Siempre: casi cada día

| **ACTITUDES** |  | |  | |  |  | |  | |
| --- | --- | --- | --- | --- | --- | --- | --- | --- | --- |
|  | | De Acuerdo | | En desacuerdo | | | No se | |
| Trato de comer una dieta sana | |  | |  | | |  | |
| Una dieta alta en sal puede causar problemas importantes en mi salud | |  | |  | | |  | |
| Trato de comer la menor sal posible | |  | |  | | |  | |
| Hay demasiada presión para comer saludable | |  | |  | | |  | |
| Hay suficiente información nutricional en los envases de los alimentos | |  | |  | | |  | |
| Leo las etiquetas de los alimentos para saber su contenido con sal. | |  | |  | | |  | |

**COMPORTAMIENTO**

|  | De Acuerdo | En desacuerdo | No se |
| --- | --- | --- | --- |
| ¿Agrega sal a la comida? |  |  |  |
| ¿Agrega sal cuando prepara la comida? |  |  |  |
| ¿Suele comprar productos bajos en sal? |  |  |  |

**CONOCIMIENTOS**

| En general sé si los alimentos tienen mucha o poca sal | De acuerdo | En desacuerdo | No se |
| --- | --- | --- | --- |
|  |  |  |

| ¿Qué cantidad de sal como máximo recomienda la OMS (Organización Mundial de la Salud) consumir al día? | 15 gramos | 10 gramos | 5 gramos | No se |
| --- | --- | --- | --- | --- |
|  |  |  |  |

| ¿De donde procede la principal cantidad de sal que ingerimos? | La sal añadida (en la mesa o en la cocina) | Los alimentos procesados (conservas, embutidos, quesos,…) | Alimentos frescos | No se |
| --- | --- | --- | --- | --- |
|  |  |  |  |

**ANEXO 2:** Hoja informativa del estudio para el participante.

**CONSUMO Y CONOCIMIENTOS DE LA SAL EN PROFESIONALES SANITARIOS Y POBLACIÓN GENERAL**

Investigador principal: ……………………………

Este es un estudio de investigación en el que se le invita a participar de forma totalmente voluntaria.

- Uno de los principales factores implicados en el origen de la Hipertensión Arterial es el excesivo consumo de sal que se ingiere en los alimentos, **el objetivo de este estudio es conocer el comportamiento, actitudes y conocimientos que tiene en cuanto al consumo de sal contenido en los alimentos.**
- Se mantendrá la confidencialidad de los datos según la normativa vigente de la Agencia Oficial de Protección de Datos y por lo tanto se mantendrá su anonimato en todo momento.
- Las anotaciones recogidas permanecerán siempre confidenciales y no se revelará su nombre en ningún caso.
- El riesgo de participar en el estudio será el mismo que si no participara en el mismo, puesto que no se realizan pruebas invasivas ni se modificarán tratamientos como consecuencia del proyecto.
- El beneficio esperado a corto plazo en el estudio tampoco se verá afectado. Sin embargo, un mayor conocimiento sobre el riesgo de la ingesta de sal le podrá ser beneficioso en el futuro.
- Los registros obtenidos pueden ser auditados por personas autorizadas de la misma institución (p. ej., comité ético de investigación clínica) o externas (p. ej., promotores u organismos reguladores).
- Tiene la posibilidad de cambiar su decisión y revocar el consentimiento en cualquier momento, sin que esto altere la relación con su médico u otro personal sanitario ni se produzca ningún perjuicio en su tratamiento.

Gracias por su colaboración


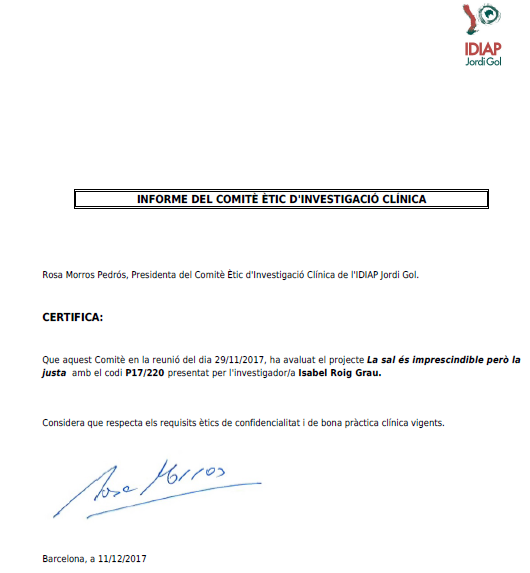

Supplement: mmc1 [file S2605073021000122:mmc1.doc]
